# Supplementary material for: An unprecedented one-step synthesis of octahedral Cu(ii)-bis(iminoquinone) complexes and their reactivity with NaBH4
Source: Royal Society of Chemistry journal article supplement (doi:10.1039/c6dt02443b), 2016-01-01
Supplement: c6dt02443b2.pdf [file c6dt02443b2.pdf]

# **An Unprecedented One-Step Synthesis of Octahedral Cu(II)- Bis(iminoquinone) Complexes and their Reactivity with NaBH<sub>4</sub>**

Manas Kumar Mondal,<sup>a</sup> and Chandan Mukherjee<sup>\*a</sup>

**\*Corresponding address:**

Dr. Chandan Mukherjee, Department of Chemistry, Indian Institute of Technology Guwahati,  
Guwahati, 781039, Assam, India

Email: [cmukherjee@iitg.ernet.in](mailto:cmukherjee@iitg.ernet.in)

Phone No. +91-361-258-2327

Fax: +91-361-258-2349

| Contents                                                                                                                                                                            | Page   |
|-------------------------------------------------------------------------------------------------------------------------------------------------------------------------------------|--------|
| Characterization of Ligand $\text{H}_2\text{L}^{\text{AP}(o\text{-NO}_2\text{-OPh})}$                                                                                               | S3-S4  |
| Characterizing data for Complex <b>1</b> (IR, mass, magnetic moment, UV-Vis/NIR, and EPR)                                                                                           | S5-S7  |
| Characterizing data for Complex <b>2</b> (IR, mass, UV-Vis/NIR, and EPR)                                                                                                            | S7-S9  |
| Characterizing data for <b>3</b> •CH <sub>2</sub> Cl <sub>2</sub> (IR, mass, UV-Vis/NIR, and EPR)                                                                                   | S9-S11 |
| Experimental X-band EPR spectra for the salt found during the synthesis of complex <b>2</b> at room temperature                                                                     | S11    |
| Possible redox states of complex <b>1</b> .                                                                                                                                         | S12    |
| GC spectra showing the production of H <sub>2</sub> gas in the presence of complex <b>3</b> and no production of H <sub>2</sub> gas in absence of the complex in CH <sub>3</sub> CN | S12    |
| Magnetic moment measurements of complex <b>2</b> and complex <b>3</b> •CH <sub>2</sub> Cl <sub>2</sub> in solution using Evan's method                                              | S13    |

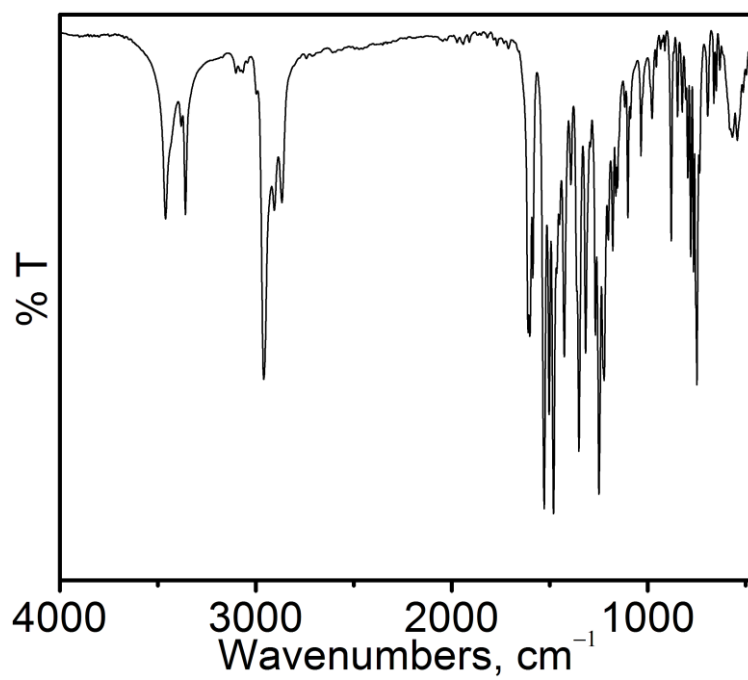

**Figure S1:** FTIR spectrum of the ligand,  $H_2L^{AP(o-NO_2-OPh)}$ .

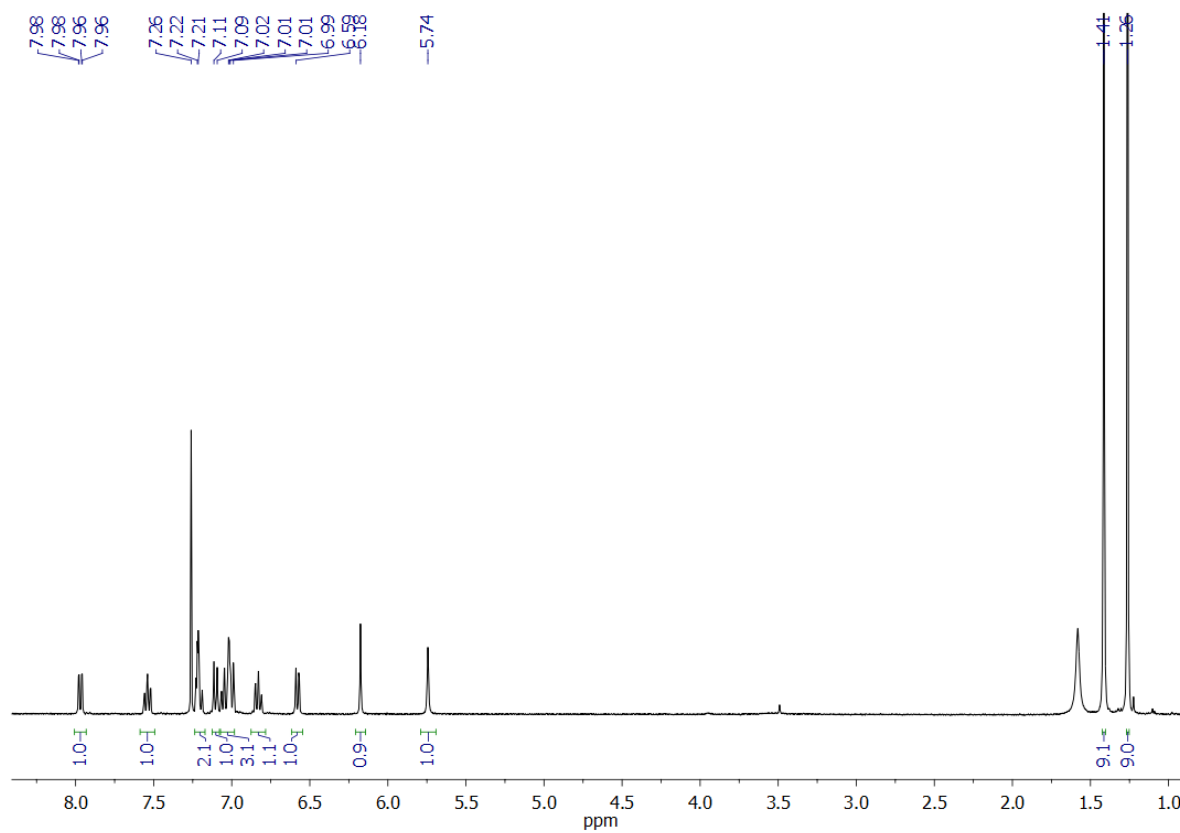

**Figure S2:**  $^1H$  NMR spectrum of the ligand,  $H_2L^{AP(o-NO_2-OPh)}$ .

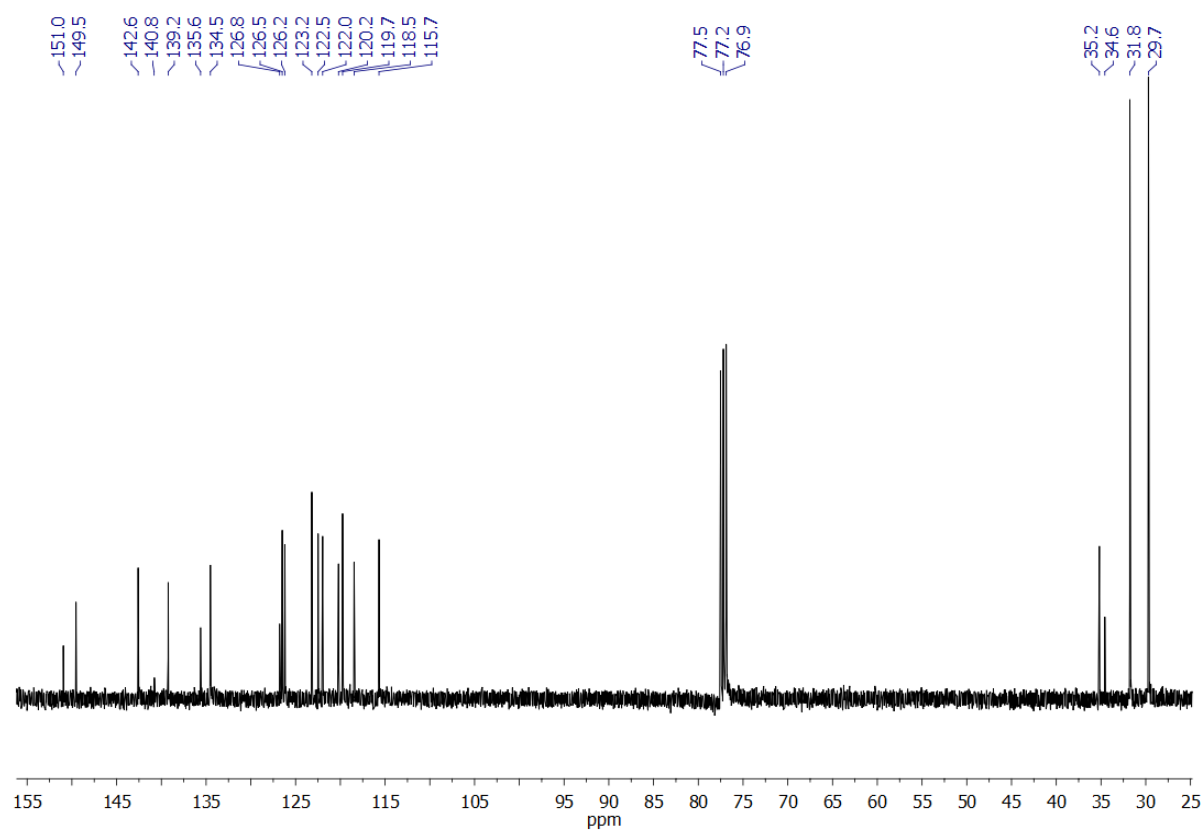

**Figure S3:**  $^{13}\text{C}$  NMR spectrum of the ligand,  $\text{H}_2\text{L}^{\text{AP}(\text{o-NO}_2\text{-OPh})}$ .

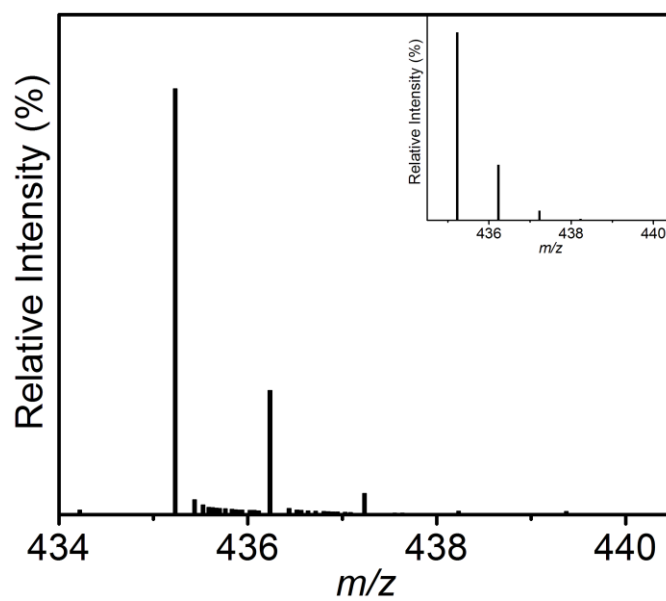

**Figure S4:** ESI-mass spectrum for  $\text{H}_2\text{L}^{\text{AP}(\text{o-NO}_2\text{-OPh})}$  in +ve mode; experimental and simulated isotopic distribution pattern (inset).

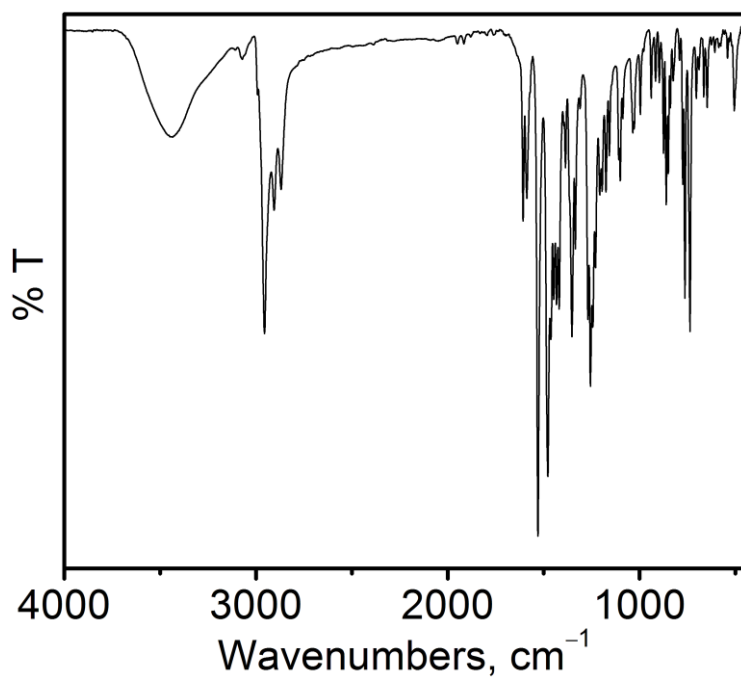

**Figure S5:** FTIR spectrum of complex **1**.

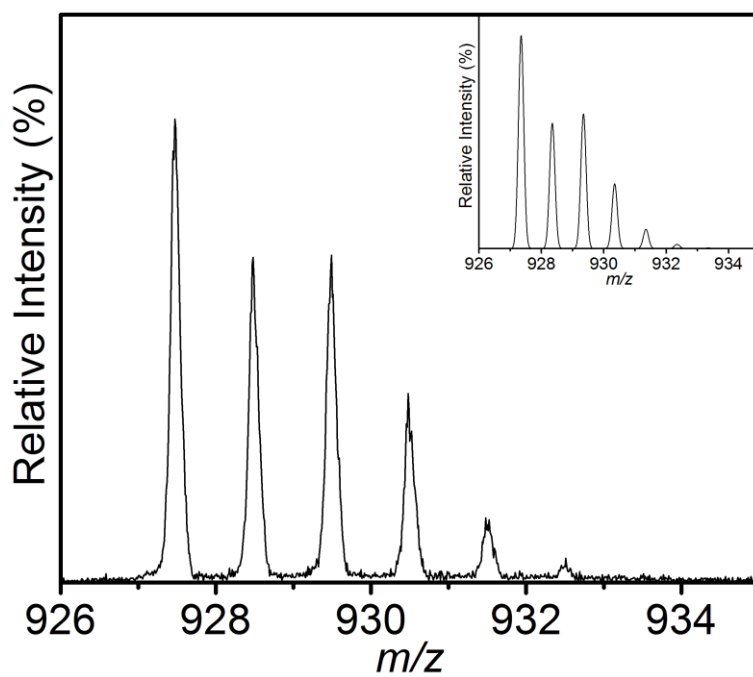

**Figure S6:** ESI-mass spectrum for **1** in +ve mode; experimental and simulated isotopic distribution pattern (inset).

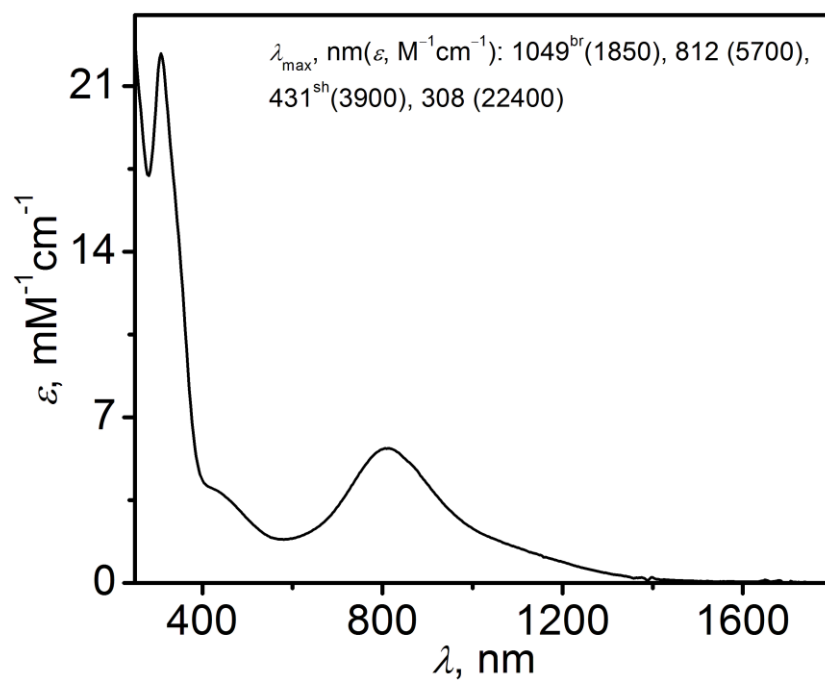

**Figure S7:** UV-vis/NIR spectrum of **1** measured at room temperature (RT) in dichloromethane solution in 250–1600 nm range.

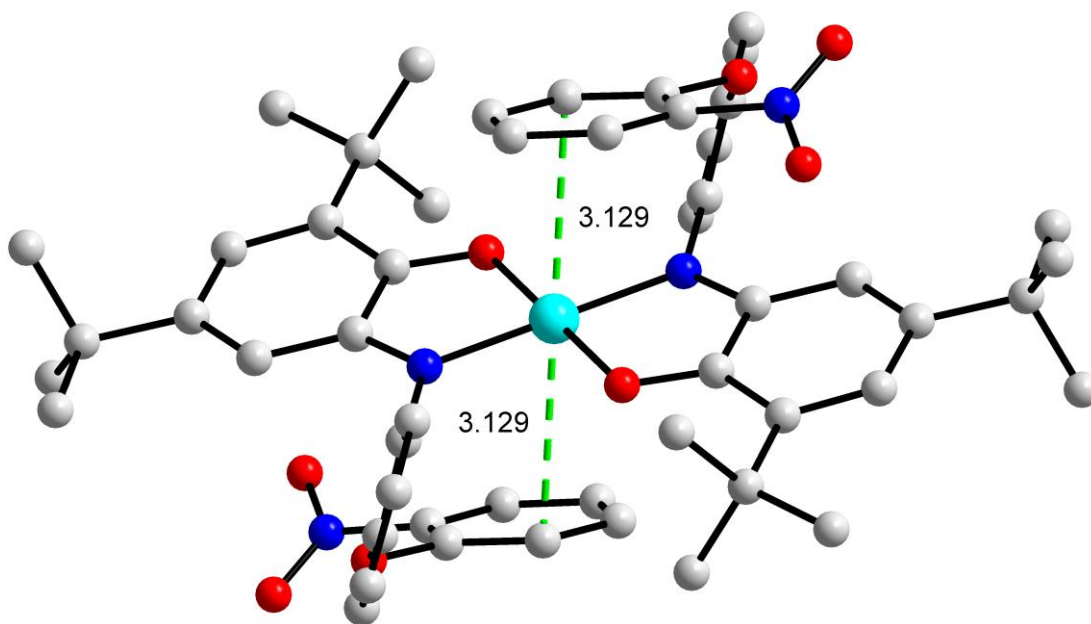

**Figure S8:** Showing Cu(II)-C<sub>Ph</sub> interaction in complex **1**. grey = C, red = O, blue = N, cyan = Cu. Distance is in Å.

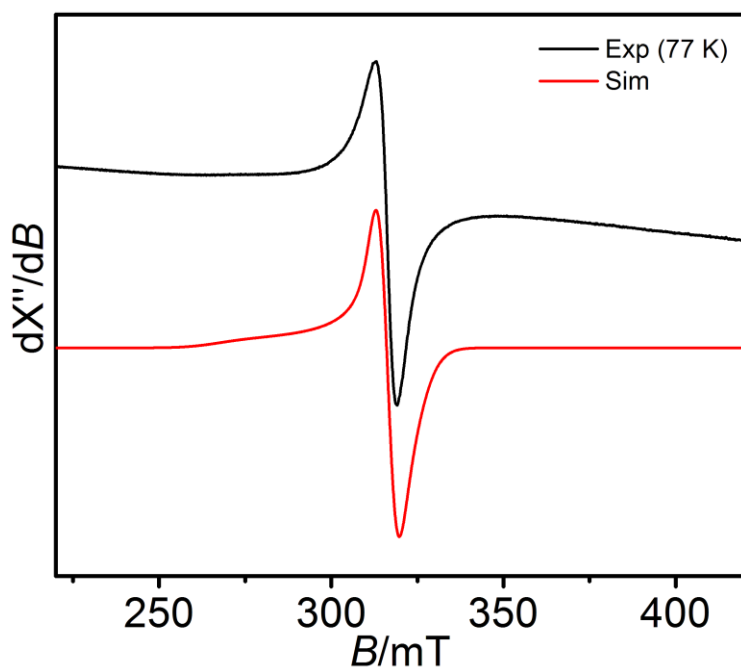

**Figure S9:** Experimental X-band EPR spectra for complexes **1** in solid state at 77 K; X-band microwave frequency (GHz): 9.145, modulation frequency (kHz): 100, microwave power (mW): 0.998, amplitude: 1.0.

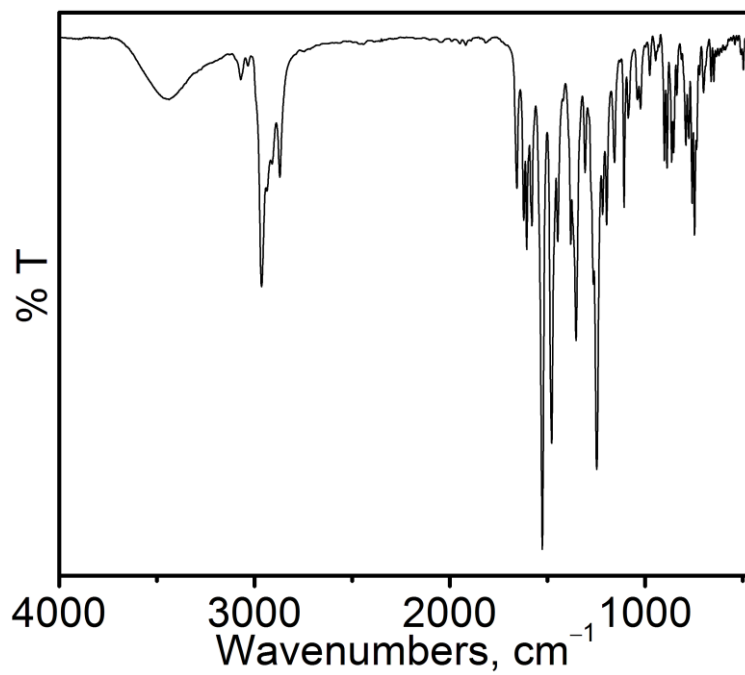

**Figure S10:** FTIR spectrum of complex **2**.

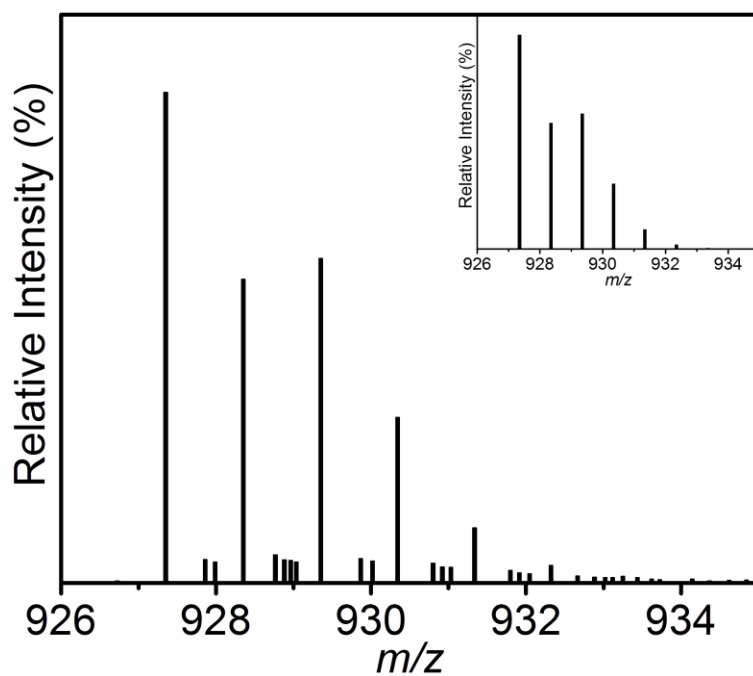

**Figure S11:** ESI-mass spectrum for **2** in +ve mode; experimental and simulated isotopic distribution pattern (inset).

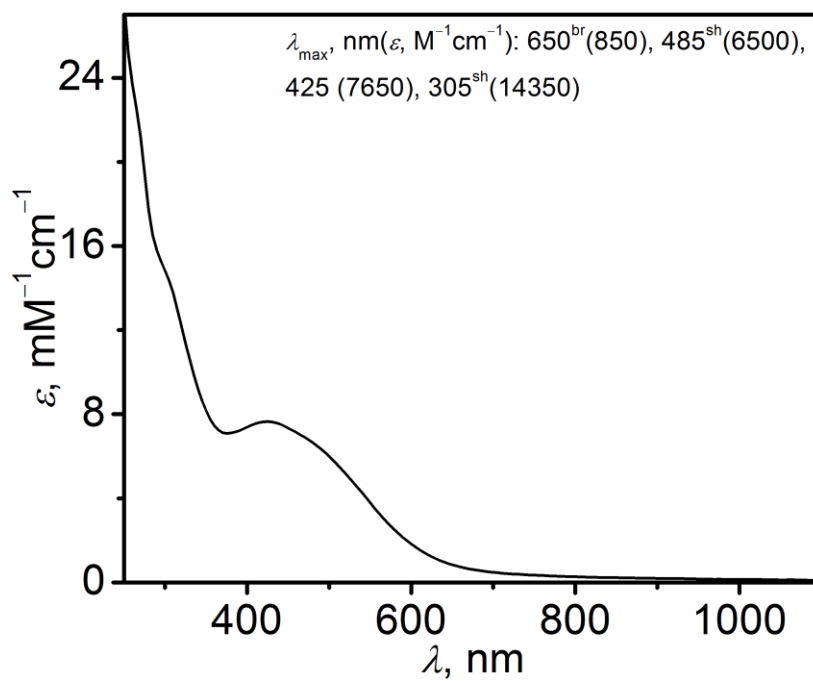

**Figure S12:** UV-vis/NIR spectrum of **2** measured at room temperature (RT) in dichloromethane solution in 250–1100 nm range.



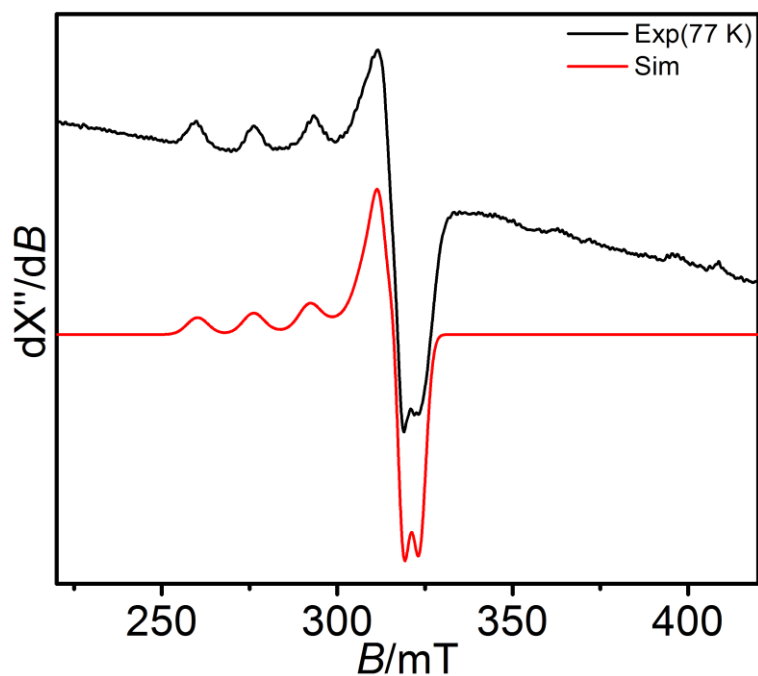

**Figure S13:** Experimental X-band EPR spectra for complexes **2** in a 5:1  $\text{CH}_2\text{Cl}_2$ /Toluene solvent mixture at 77 K; X-band microwave frequency (GHz): 9.143, modulation frequency (kHz): 100, microwave power (mW): 0.995, amplitude: 3.0.

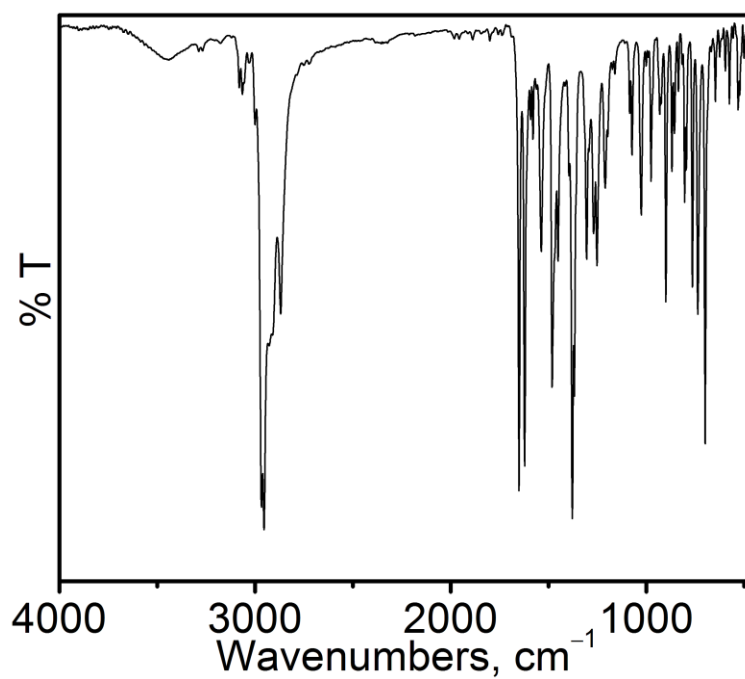

**Figure S14:** FTIR spectrum of complex **3**.

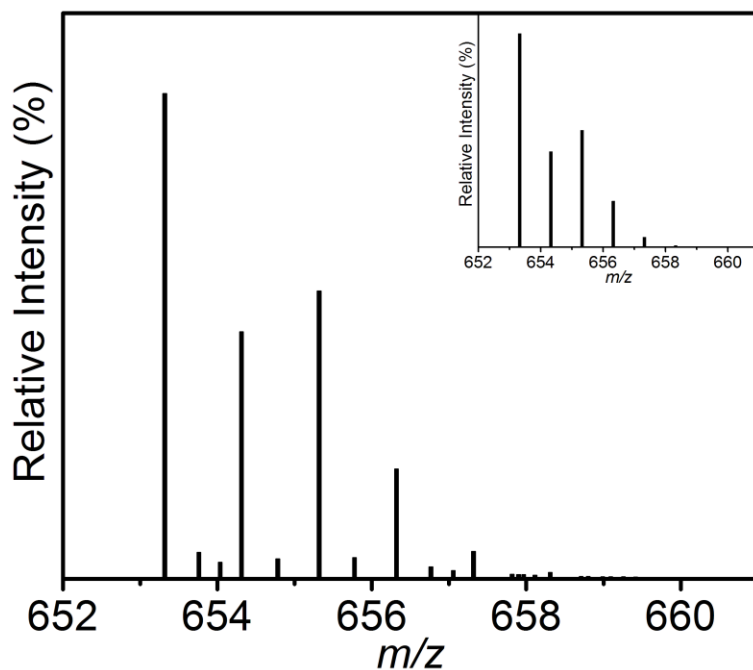

**Figure S15:** ESI–mass spectrum for **3** in +ve mode; experimental and simulated isotopic distribution pattern (inset).

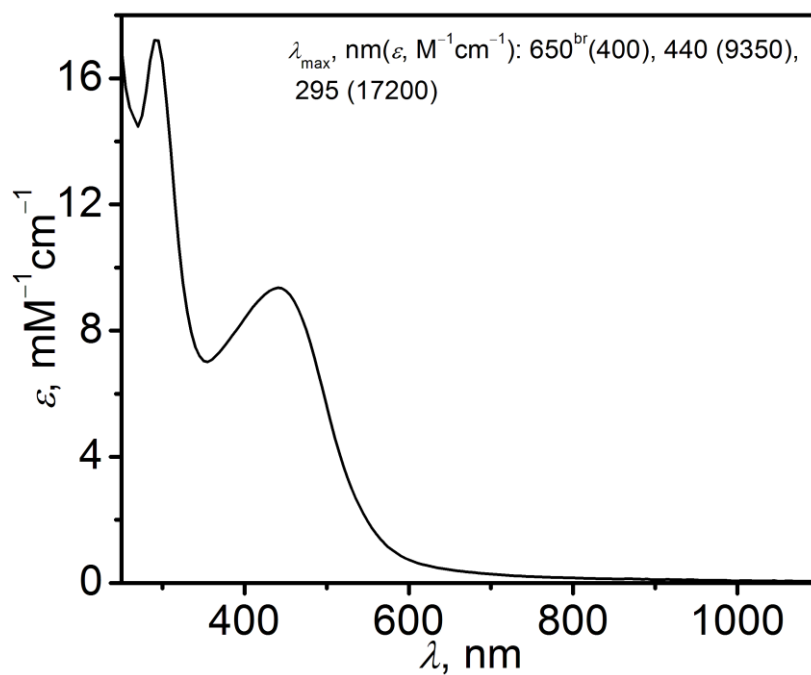

**Figure S16:** UV–vis/NIR spectrum of **3** measured at room temperature (RT) in dichloromethane solution in 250–1100 nm range.

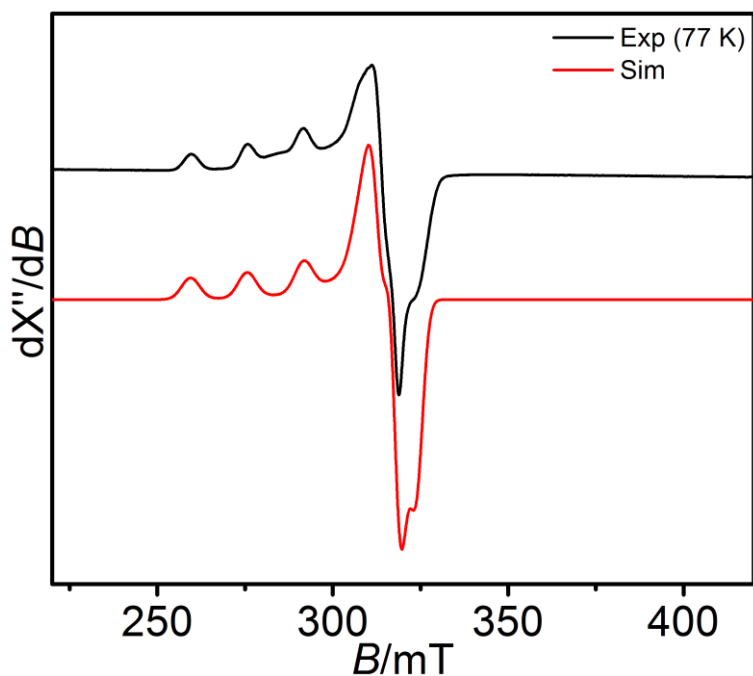

**Figure S17:** Experimental X-band EPR spectra for complexes **3** in a 5:1  $\text{CH}_2\text{Cl}_2$ /Toluene solvent mixture at 77 K; X-band microwave frequency (GHz): 9.142, modulation frequency (kHz): 100, microwave power (mW): 0.995, amplitude: 1.0.

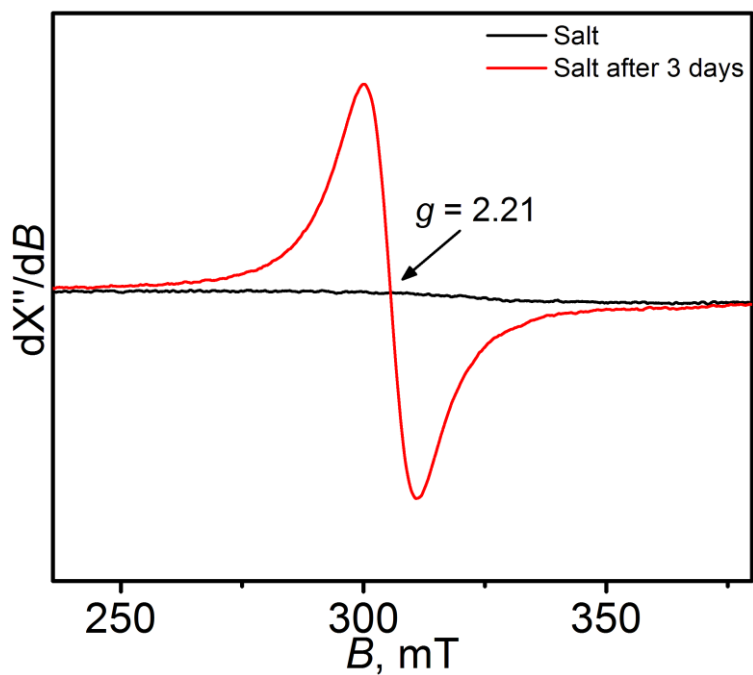

**Figure S18:** Experimental X-band EPR spectra for the salt found during the synthesis of complex **2** at room temperature; X-band microwave frequency (GHz): 9.450, modulation frequency (kHz): 100, microwave power (mW): 0.998, amplitude (G): 100.0.

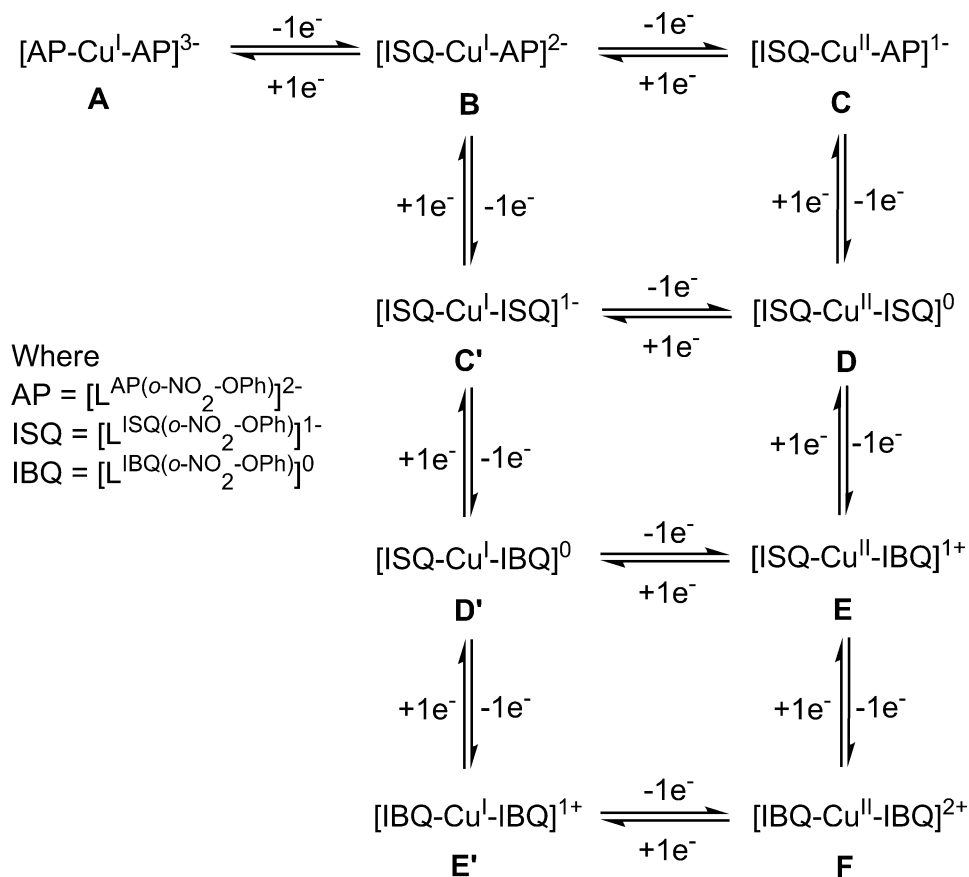

**Scheme 1.** Possible redox states of complex **1**.

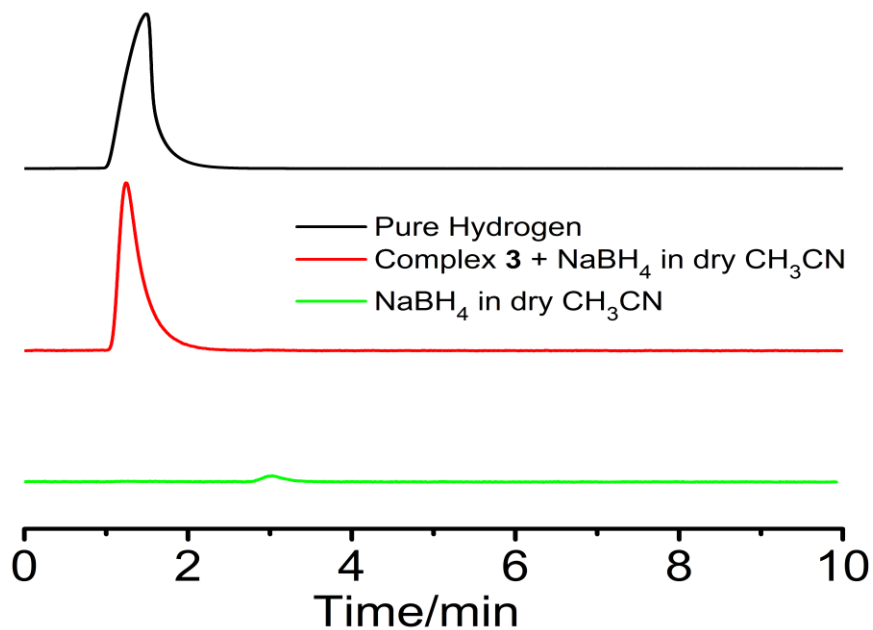

**Figure S19:** GC spectra showing the production of H<sub>2</sub> gas in the presence of complex **3** and no production of H<sub>2</sub> gas in absence of the complex in CH<sub>3</sub>CN. For all measurements 25  $\mu\text{l}$  gas was used.

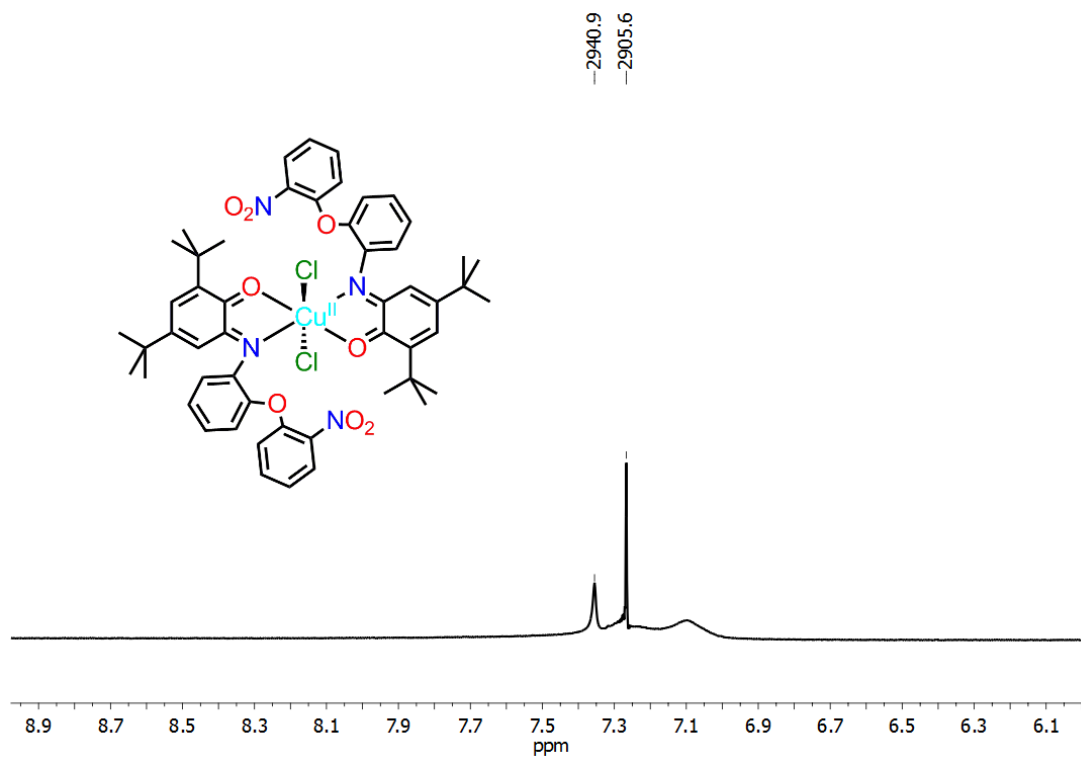

**Figure 20:** Evans method <sup>1</sup>H NMR spectrum of complex **2** in CDCl<sub>3</sub> at 400 MHz.  $\mu_{\text{eff}} = 2.05 \mu_{\text{B}}$ .

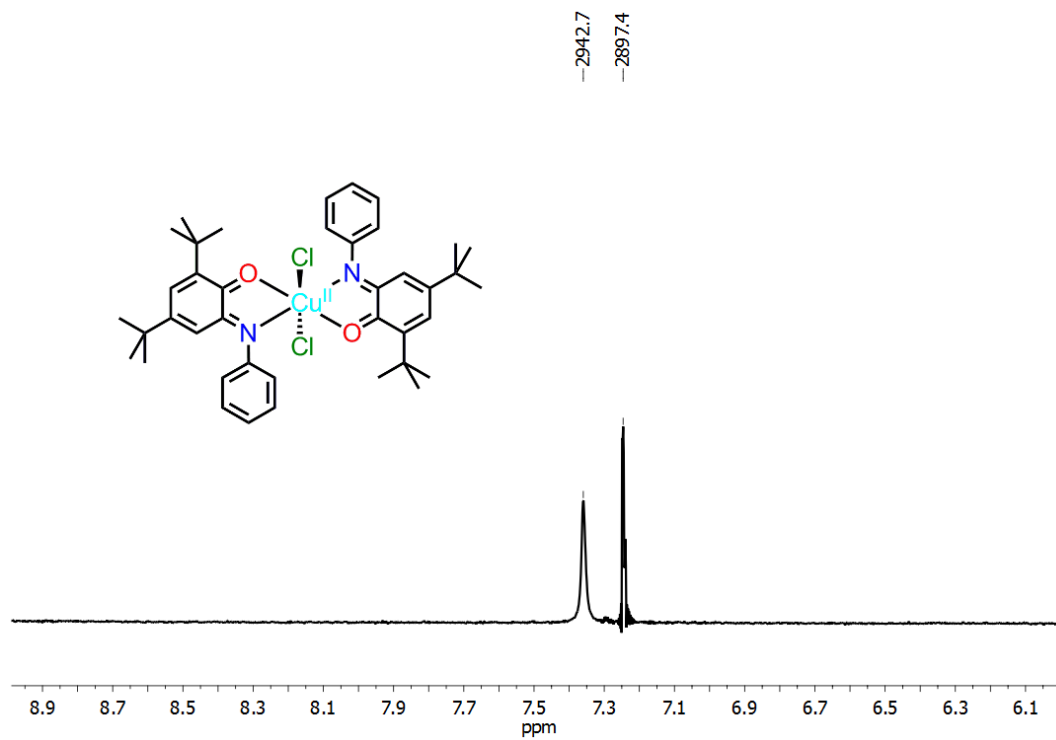

**Figure 21:** Evans method <sup>1</sup>H NMR spectrum of complex **3**•CH<sub>2</sub>Cl<sub>2</sub> in CDCl<sub>3</sub> at 400 MHz.  $\mu_{\text{eff}} = 1.95 \mu_{\text{B}}$ .
